# Supplementary material
Source: publisher site journal article supplement (https://www.dovepress.com/article/338198)
Supplement: Supplementary file 1 [file get_supplementary_file.php]

**Table. S1 The testing report of pharmacogenetic polymorphism**

**of the First Affiliated Hospital of Zhengzhou University**

| Name: | | Sex： | | Patient ID： | |
| --- | --- | --- | --- | --- | --- |
| Age: | | Department: | | PGx ID： | |
| Clinical diagnosis: | |  | | | |
| Sample Type: e.g. blood | | Submitting physicians: | | [submission](H:/%E5%BA%94%E7%94%A8%E8%BD%AF%E4%BB%B6/%E6%9C%89%E9%81%93/Dict/8.9.9.0/resultui/html/index.html" \l "/javascript:;) [date](H:/%E5%BA%94%E7%94%A8%E8%BD%AF%E4%BB%B6/%E6%9C%89%E9%81%93/Dict/8.9.9.0/resultui/html/index.html" \l "/javascript:;): | |
| **Genotypic test results** | | | | | |
| Tested drug | Tested gene | | Test site | | [Testresults](H:/%E5%BA%94%E7%94%A8%E8%BD%AF%E4%BB%B6/%E6%9C%89%E9%81%93/Dict/8.9.9.0/resultui/html/index.html" \l "/javascript:;) |
| e.g. clopidogrel | CYP2C19 | | CYP2C19*2(G＞A) | | GG |
|  | CYP2C19 | | CYP2C19*3(G＞A) | | GG |
| **Testing conclusions：**  This patient has a wild-type CYP2C19 gene and normal enzyme activity. The activation ability of clopidogrel metabolites was normal. | | | | | |
| **Individualized medication recommendations:**  1. The patient's CYP2C19 phenotype is fast metabolizing. Combining the patient's other genetic results, it is recommended that the medication be administered at the usual clinical dose.  2. If combined with aspirin, heparin, warfarin, NSAIDs, attention should be paid to observe any bleeding in the skin and mucous membranes.  3. Avoid co-administration with CYP2C19 enzyme inhibitors such as omeprazole and lansoprazole, as the anti-platelet effect of clopidogrel will be inhibited.  4. CYP2C19*2 (G>A) and CYP2C19*3 (G>A) sites are detected by fluorescence in situ hybridization. In case of no special circumstances, the above sites need not be detected. | | | | | |
| **Description:**  Clopidogrel is a precursor drug that relies primarily on the metabolism of CYP2C19 to produce active metabolites for its anti-platelet efficacy.  Regular doses of clopidogrel produce fewer active metabolites in patients with slow metabolism, reduced inhibition of platelet aggregation and increased risk of thrombosis; in patients with ultra-fast metabolism, increased production of active metabolites, enhanced inhibition of platelet aggregation and increased risk of bleeding. | | | | | |
| Tester: | Reporter: | | Checker: | | [Report](C:/Users/hp/AppData/Local/youdao/dict/Application/8.9.6.0/resultui/html/index.html" \l "/javascript:;) [time](C:/Users/hp/AppData/Local/youdao/dict/Application/8.9.6.0/resultui/html/index.html" \l "/javascript:;): |

Note: The above recommendations are for clinical reference only. Other factors may also affect the therapeutic effects and toxic reactions of the drugs, and the treatment plan should be formulated and adjusted according to the actual clinical situation.
